# Supplementary material
Source: PubMed Central journal article supplement (PMC4883095)
Supplement: NIHMS787525-supplement-supplement_1.pdf [file NIHMS787525-supplement-supplement_1.pdf]

**Supplementary Materials:**

Materials and Methods

Figures S1-S6

Tables S1-S6

Movies S1-S2

References (35-40)

Supplementary Materials for:

**The structure of the  $\beta$ -barrel assembly machinery complex**

Jeremy Bakelar<sup>1</sup>, Susan K. Buchanan<sup>2</sup>, and Nicholas Noinaj<sup>1\*</sup>

<sup>1</sup>Markey Center for Structural Biology, Department of Biological Sciences, Purdue University, West Lafayette, Indiana, 47907.

<sup>2</sup>National Institute of Diabetes and Digestive and Kidney Diseases, National Institutes of Health, Bethesda, Maryland, 20892.

\*Correspondence to: [noinaj@purdue.edu](mailto:noinaj@purdue.edu)

**Supplementary Materials include:**

Materials and Methods

Figures S1-S6

Tables S1-S6

Movies S1-S2

References (35-40)

## Materials and Methods:

### *Expression of recombinant BamABCDE complex*

A single plasmid (pJH114) containing all five Bam proteins (BamA, B, C, D, and E) was obtained from Harris Bernstein and used for expression and purification (11). The plasmid was transformed into BL21(DE3) cells (NEB), plated onto LB-carbenicillin agar plates (Teknova) and incubated overnight at 37°C. A single colony was used to inoculate a 5-mL LB-ampicillin culture and incubated overnight at 37°C. The overnight culture was then used to inoculate a 50 mL starter culture of LB-ampicillin which was allowed to grow to saturation. The cells were then centrifuged, washed three times with 1x PBS and then re-suspended in 12 mL 1x PBS. The resuspended cells (1 mL) were then added to twelve 2 L baffled flasks containing 1 L of 2xYT medium supplemented with ampicillin (50 µg/mL). These cultures were incubated at 37°C with shaking at 180 rpm, grown to an OD<sub>600</sub> between 0.8-1.0, and then induced with 0.5 mM IPTG. Cultures were grown an additional 4 hours at 37°C before harvesting. Cells were either used immediately or flash frozen and stored at -20°C.

### *Purification and crystallization*

Cells were resuspended in lysis buffer (1x PBS supplemented with DNase I (10 µg/ml) and PMSF (500 µM)) and lysed with three passes through an Emusiflex C-3 high pressure homogenizer (Avestin) at 18,000 psi. The cell lysate was then centrifuged at 6000 x g for 10 min at 4°C to remove cell debris, and the resulting supernatant was centrifuged at 200,000 x g for 90 min at 4°C to isolate cell membranes. The membranes were then re-suspended in solubilization buffer (1x PBS, 1% DDM, and 37 mM imidazole) using a dounce homogenizer and stirred at medium speed overnight at 4°C. The solubilized sample was then centrifuged again at 200,000 x g for 60 min at 4°C and the supernatant collected.

Solubilized BamABCDE complex was purified by affinity chromatography using a 5 mL HiTrap Nickel column (Qiagen) and an ÄKTA Pure system (GE Healthcare). The column was equilibrated with Buffer A (1x PBS, 0.03% DDM, and 37 mM imidazole) and the sample automatically loaded using the sample pump with an in-line air sensor. Protein was eluted with a linear gradient of 37-500 mM imidazole using Buffer A and Buffer B (1x PBS, 0.03% DDM, and 1 M imidazole). Fractions containing BamABCDE were pooled, concentrated to ~2 mg/mL, and passed through a 16/60 Sephacryl S-300 HR column (GE Healthcare) at a flow rate of 0.5 mL/min using 25 mM Tris-HCl, pH 7.5, 150 mM NaCl, and 0.6% C<sub>8</sub>E<sub>4</sub>. All five Bam proteins (BamA, B, C, D, and E) eluted from the gel filtration column as a single monodisperse peak as verified by SDS-PAGE analysis. Fractions containing BamABCDE were pooled and concentrated to ~12 mg/mL.

Broad crystallization screening was performed using hanging drop method on a Mosquito LCP crystallization robot (TTP Labtech) with commercially available crystallization screens. An initial hit was improved by additive screening using the AdditiveHT screen (Hampton Research) with final crystals grown at 22°C in 100 mM Tris-HCl, pH 8.5, 200 mM MgCl<sub>2</sub>, 10 mM MnCl<sub>2</sub>, and 8% PEG 4000.

### *Data collection, structure determination, and modeling*

Crystals were harvested by quick transfer directly into a cryoprotectant solution containing 20% glycerol and flash-cooled in liquid nitrogen. Diffraction data were collected to 3.4 Å resolution at the SER-CAT beamline (ID22) at the Advanced Photon Source at Argonne National Laboratory and processed using HKL2000 (35). The structure was solved by molecular replacement using Phaser (36) within PHENIX (37) using previously reported crystal structures of the Bam components. Search order was key here for success, first starting with the BamCD complex (PDB ID 3TGO) followed by the barrel domain of BamA (PDB ID 4C4V), POTRA5 and then POTRA4 of BamA (PDB ID 3Q6B). BamE (PDB ID 2KM7) and POTRA1 (PDB ID 3EFC) were then placed based on density within a difference ( $F_o-F_c$ ) map. After several rounds of building and refinement, POTRA2 and 3 (PDB ID 3EFC) were then manually placed in weak density followed by rigid body refinement for all components for final placement. The structure was refined to  $R/R_{\text{free}}$  values of 0.22/0.27. All model building and refinement were performed using COOT (38) and PHENIX (37), respectively. Final placement of side chains was based on evaluation of  $2F_o-F_c$ ,  $F_o-F_c$ , and feature-enhanced (FEM) density maps (39). RMSD analysis was performed within PyMOL (Schrödinger) for C- $\alpha$  atoms using default settings. Surprisingly, BamB was not found within our crystal structure despite it being present in our purification. The absence of BamB was confirmed by analyzing crystals and our initial sample of the complex by SDS-PAGE analysis, which also were lacking BamB presumably due to proteolysis during storage/incubation.

To see how BamB interacts with the BamACDE complex, we modeled BamB into our complex using the previous reported BamAB crystal structure (PDB ID 4PK1) to produce the modeled structure of the fully assembled BamABCDE complex. Here, we were able to place BamB in our structure by performing a superposition of the two structures along POTRA3 of BamA. Analysis of interacting interfaces was performed using the PDBePISA (40). All figures were made with PyMOL (Schrödinger) and annotated and finalized with Adobe Illustrator.

| <b>Data Collection</b>                   | <b>BamACDE</b>         |
|------------------------------------------|------------------------|
| $\lambda$ (Å)                            | 1.0                    |
| Space group                              | C2                     |
| Mol/ASU                                  | 1                      |
| a, b, c (Å)                              | 234.85, 109.23, 103.99 |
| $\alpha$ , $\beta$ , $\gamma$ (°)        | 90, 95.04, 90          |
| Resolution (Å)                           | 50 - 3.4 (3.52 - 3.4)  |
| Completeness (%) <sup>*</sup>            | 99.6 (99.9)            |
| Redundancy <sup>*</sup>                  | 6.3 (6.4)              |
| Wilson B-factor (Å <sup>2</sup> )        | 133                    |
| R <sub>sym</sub> <sup>*</sup>            | 0.12 (1.00)            |
| I / $\sigma$ (I) <sup>*</sup>            | 21.3 (1.6)             |
|                                          |                        |
| <b>Refinement</b>                        |                        |
| Resolution (Å)                           | 30 - 3.4               |
| No. reflections                          | 36,000                 |
| R/R <sub>free</sub>                      | 0.23/0.28              |
|                                          |                        |
| <b>r.m.s. deviations</b>                 |                        |
| Bonds (Å)                                | 0.004                  |
| Angles (°)                               | 1.082                  |
| No. Protein atoms                        | 9409                   |
|                                          |                        |
| <b>B-factors (Å<sup>2</sup>)</b>         |                        |
| Protein                                  | 158                    |
|                                          |                        |
| <b>Ramachandran Analysis<sup>‡</sup></b> |                        |
| Favored (%)                              | 84.6                   |
| Allowed (%)                              | 15.0                   |
| Outliers (%)                             | 0.4                    |
| PDB code                                 | -                      |
|                                          |                        |

<sup>‡</sup> Performed using Molprobit.

<sup>\*</sup> Indicates statistics for last resolution shell shown in parenthesis.

**Table S1. Data collection and refinement statistics.**

| BamC           | Group | Location     | BamD    | Group | Location | Distance [Å] |
|----------------|-------|--------------|---------|-------|----------|--------------|
| Hydrogen bonds |       |              |         |       |          |              |
| LYS 32         | O     | Unstructured | TYR 77  | OH    | Helix 3  | 2.78         |
| SER 36         | N     | Unstructured | TYR 80  | OH    | Helix 3  | 2.87         |
| SER 36         | OG    | Unstructured | LYS 81  | NZ    | Helix 3  | 3.36         |
| TYR 41         | OH    | Unstructured | ASP 162 | OD2   | Helix 7  | 2.86         |
| TYR 41         | OH    | Unstructured | ARG 166 | NH2   | Helix 7  | 2.83         |
| ALA 48         | N     | Unstructured | ASP 207 | O     | Loop 8   | 3.4          |
| ALA 48         | O     | Unstructured | ARG 212 | NH1   | Helix 9  | 3.61         |
| GLU 49         | O     | Unstructured | ARG 212 | NH1   | Helix 9  | 3.52         |
| HIS 51         | N     | Unstructured | ASN 241 | OD1   | C-term.  | 2.77         |
| HIS 51         | O     | Unstructured | ASN 241 | ND2   | C-term.  | 3.63         |
| THR 61         | O     | Unstructured | ASP 204 | N     | Helix 8  | 3.8          |
| SER 62         | OG    | Unstructured | ARG 203 | O     | Helix 8  | 3.06         |
| TYR 65         | OH    | Unstructured | ARG 141 | NH1   | Helix 6  | 3.51         |
| ALA 66         | O     | Unstructured | ARG 152 | NH1   | Helix 6  | 3.57         |
| THR 70         | OG1   | Unstructured | THR 164 | OG1   | Helix 7  | 2.96         |
| GLY 74         | O     | Unstructured | THR 161 | OG1   | Helix 7  | 3.71         |
| GLY 77         | N     | Unstructured | ASP 162 | OD2   | Helix 7  | 2.91         |
| ILE 82         | O     | Unstructured | TYR 107 | OH    | Helix 5  | 2.99         |
| PRO 85         | O     | Unstructured | GLN 70  | NE2   | Helix 3  | 3.23         |
| LEU 151        | N     | N-domain     | GLN 44  | OE1   | Helix 1  | 3.37         |
| ALA 192        | N     | N-domain     | GLN 158 | OE1   | Loop 6   | 3.39         |

| Additional interface residues (BamC) |         |         |         | Additional interface residues (BamD) |         |         |         |
|--------------------------------------|---------|---------|---------|--------------------------------------|---------|---------|---------|
| TYR 31                               | GLN 34  | VAL 35  | GLY 37  | GLN 40                               | GLN 41  | LEU 43  | ASP 45  |
| ASP 38                               | ALA 40  | LEU 42  | ALA 44  | GLY 46                               | ASN 47  | TRP 48  | GLN 69  |
| ALA 45                               | PRO 46  | LEU 47  | LEU 50  | LEU 73                               | ASP 74  | ASN 104 | TYR 110 |
| ALA 52                               | PRO 53  | ALA 54  | MET 56  | MET 111                              | LEU 114 | MET 117 | ALA 118 |
| ILE 57                               | LEU 58  | PRO 59  | VAL 60  | ASP 121                              | GLY 126 | PHE 144 | SER 148 |
| GLY 63                               | ASP 64  | ILE 67  | PRO 68  | VAL 151                              | PRO 155 | TYR 159 | THR 160 |
| GLY 72                               | SER 73  | ALA 75  | VAL 76  | LYS 165                              | LEU 167 | VAL 168 | PHE 169 |
| LEU 80                               | ASP 81  | ARG 83  | PRO 84  | LYS 171                              | ASP 172 | LEU 174 | GLU 199 |
| ALA 86                               | GLN 87  | ARG 150 | ASP 152 | LEU 202                              | TYR 205 | PRO 206 | THR 208 |
| ASP 190                              | ALA 191 | GLN 195 | GLU 200 | GLN 209                              | THR 211 | LEU 215 | LYS 233 |
|                                      |         |         |         | LYS 236                              | ILE 237 | ALA 240 | ASN 244 |

**Table S2. Summary of interactions between BamC and BamD.** This is a summary of all interactions between BamC and BamD as analyzed by PDBePISA.

| BamD           | Group | Location | BamE    | Group | Location | Distance [Å] |
|----------------|-------|----------|---------|-------|----------|--------------|
| Hydrogen bonds |       |          |         |       |          |              |
| TRP 191        | N     | Helix 8  | GLN 34  | OE1   | β1       | 3.21         |
| VAL 192        | N     | Helix 8  | GLN 34  | OE1   | β1       | 2.75         |
| ALA 193        | N     | Helix 8  | GLN 34  | OE1   | β1       | 3.64         |
| ASN 196        | ND2   | Helix 8  | LEU 63  | O     | Loop 3   | 3.09         |
| GLN 224        | O     | Helix 9  | ARG 78  | NH1   | β2       | 3.64         |
| GLN 224        | O     | Helix 9  | ARG 78  | NH2   | β2       | 3.76         |
| MET 225        | O     | Helix 9  | GLN 88  | NE2   | β3       | 2.37         |
| GLN 226        | O     | Helix 9  | LYS 107 | NZ    | β4       | 2.48         |
| GLN 226        | OE1   | Helix 9  | SER 111 | N     | C-term.  | 3.64         |
| GLN 230        | NE2   | Helix 10 | ASP 66  | OD1   | Loop 3   | 2.67         |
| GLN 230        | NE2   | Helix 10 | PRO 67  | O     | Loop 3   | 3.22         |
| Salt bridges   |       |          |         |       |          |              |
| LYS 233        | NZ    | Helix 10 | ASP 66  | OD1   | Loop 3   | 3.59         |

| Additional interface residues ( <b>BamD</b> ) |         |         |         | Additional interface residues ( <b>BamE</b> ) |        |         |        |
|-----------------------------------------------|---------|---------|---------|-----------------------------------------------|--------|---------|--------|
| ARG 188                                       | GLY 189 | ALA 190 | VAL 195 | ARG 29                                        | PRO 30 | ILE 32  | GLY 35 |
| GLU 199                                       | LEU 202 | MET 218 | TYR 222 | MET 64                                        | SER 65 | PHE 68  | THR 70 |
| TYR 222                                       | MET 227 | ALA 229 | VAL 234 | THR 72                                        | PHE 74 | TYR 75  | VAL 76 |
| ILE 237                                       |         |         |         | GLN 80                                        | THR 90 | LEU 110 |        |

**Table S3. Summary of interactions between BamD and BamE.** This is a summary of all interactions between BamD and BamE as analyzed by PDBePISA.

| interface residues ( <b>BamC</b> ) |        |        |        |
|------------------------------------|--------|--------|--------|
| GLY 55                             | MET 56 | ILE 57 | LEU 58 |
| PRO 59                             |        |        |        |

| interface residues ( <b>BamE</b> ) |        |        |  |
|------------------------------------|--------|--------|--|
| PRO 67                             | PHE 68 | GLY 69 |  |
|                                    |        |        |  |

**Table S4. Summary of interactions between BamC and BamE.** This is a summary of all interactions between BamC and BamE as analyzed by PDBePISA.



| BamA           | Group | Location  | BamD    | Group | Location | Distance [Å] |
|----------------|-------|-----------|---------|-------|----------|--------------|
| Hydrogen bonds |       |           |         |       |          |              |
| Ile 352        | O     | POTRA 5   | ARG 197 | NH2   | Helix 8  | 3.32         |
| GLY 356        | N     | POTRA 5   | ASP 136 | OD2   | Loop 5   | 2.83         |
| ASP 357        | O     | POTRA 5   | ASP 136 | N     | Loop 5   | 2.93         |
| ASP 358        | O     | POTRA 5   | ARG 132 | NH1   | Loop 5   | 2.94         |
| THR 359        | O     | POTRA 5   | GLN 125 | NE2   | Loop 5   | 3.1          |
| THR 359        | O     | POTRA 5   | ARG 135 | NH1   | Loop 5   | 2.31         |
| ASP 362        | OD2   | POTRA 5   | TYR 177 | OH    | Helix 7  | 2.84         |
| ARG 366        | NH1   | POTRA 5   | TYR 185 | OH    | Helix 7  | 3.35         |
| GLU 373        | N     | POTRA 5   | TYR 185 | OH    | Helix 7  | 3.68         |
| Salt bridges   |       |           |         |       |          |              |
| ASP 358        | OD1   | POTRA 5   | HIS 139 | NE2   | Loop 5   | 3.47         |
| ASP 358        | OD2   | POTRA 5   | HIS 139 | NE2   | Loop 5   | 3.55         |
| GLU 373        | OE1   | POTRA 5   | ARG 197 | NE    | Helix 8  | 2.97         |
| GLU 373        | OE1   | POTRA 5   | ARG 197 | NH2   | Helix 8  | 3.8          |
| GLU 373        | OE2   | POTRA 5   | ARG 197 | NE    | Helix 8  | 3.28         |
| GLU 373        | OE2   | POTRA 5   | ARG 197 | NH2   | Helix 8  | 2.55         |
| ASP 481        | OD1   | P. Loop 2 | ARG 188 | NH2   | Helix 7  | 2.91         |

| Additional interface residues (BamA) |         |         |         |
|--------------------------------------|---------|---------|---------|
| ALA 95                               | SER 96  | ARG 120 | VAL 121 |
| GLY 122                              | GLU 123 | ARG 160 | ARG 350 |
| LYS 351                              | ARG 353 | PHE 354 | GLU 355 |
| SER 360                              | LYS 361 | ALA 363 | ARG 367 |
| MET 369                              | ARG 370 | GLN 371 | MET 372 |
| GLY 374                              | GLN 446 | TRP 449 | LEU 450 |
| GLY 451                              | THR 452 | TYR 477 | VAL 480 |

| Additional interface residues (BamD) |         |         |         |
|--------------------------------------|---------|---------|---------|
| PRO 63                               | PHE 64  | ARG 94  | ARG 97  |
| LEU 98                               | THR 101 | LEU 119 | ASP 120 |
| SER 122                              | LEU 124 | PHE 128 | VAL 130 |
| ASP 131                              | ASP 134 | PRO 137 | GLN 138 |
| ARG 141                              | GLU 178 | SER 180 | VAL 181 |
| TYR 184                              | GLU 187 | ALA 190 | VAL 192 |
| ALA 193                              | ASN 196 | GLY 200 | ARG 203 |

**Table S5. Summary of interactions between BamA and BamD.** This is a summary of all interactions between BamA and BamD as analyzed by PDBePISA.

| BamA           | Group | Location  | BamE   | Group | Location | Distance [Å] |
|----------------|-------|-----------|--------|-------|----------|--------------|
| Hydrogen bonds |       |           |        |       |          |              |
| TYR 348        | OH    | POTRA 5   | TYR 37 | N     | Loop 1   | 3.44         |
| TYR 348        | OH    | POTRA 5   | TYR 37 | O     | Loop 1   | 3.66         |
| TYR 348        | OH    | POTRA 5   | LEU 59 | O     | α2       | 3.82         |
| GLU 373        | O     | POTRA 5   | GLN 34 | NE2   | β1       | 2.9          |
| GLY 374        | O     | POTRA 5   | GLY 35 | N     | β1       | 3.26         |
| SER 408        | OG    | POTRA 5   | THR 61 | OG1   | Loop 3   | 3.34         |
| ASP 410        | OD2   | POTRA 5   | THR 61 | N     | Loop 3   | 2.44         |
| ASP 410        | OD2   | POTRA 5   | THR 61 | OG1   | Loop 3   | 2.97         |
| GLN 411        | NE2   | POTRA 5   | THR 61 | OG1   | Loop 3   | 3.22         |
| PRO 518        | O     | P. Loop 3 | TYR 28 | N     | N-term.  | 3.46         |
| GLU 521        | OE2   | P. Loop 3 | TYR 28 | OH    | N-term.  | 3.48         |

| Additional interface residues (BamA) |         |         |         |
|--------------------------------------|---------|---------|---------|
| ASN 345                              | ARG 346 | VAL 349 | ARG 350 |
| ARG 370                              | MET 372 | ALA 375 | TRP 376 |
| PRO 409                              | ASP 481 | VAL 483 | PHE 517 |
| ILE 519                              | ASN 520 |         |         |

| Additional interface residues (BamE) |        |        |        |
|--------------------------------------|--------|--------|--------|
| VAL 27                               | ARG 29 | PRO 30 | ASP 31 |
| ILE 32                               | ASN 33 | ASN 36 | THR 39 |
| ASP 42                               | ALA 56 | TYR 57 | GLY 60 |
| PRO 62                               | LEU 63 | PHE 77 | ARG 78 |
| GLN 79                               | HIS 83 |        |        |

**Table S6. Summary of interactions between BamA and BamE.** This is a summary of all interactions between BamA and BamE as analyzed by PDBePISA.

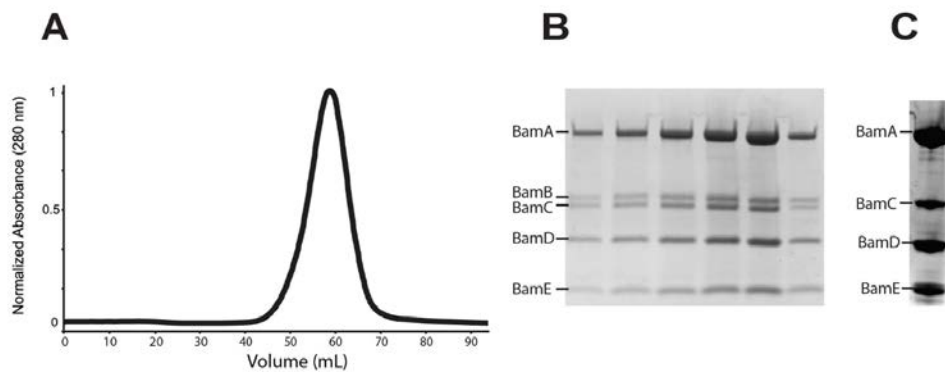

**Figure S1. Purification of the BAM complex.** **A.** Gel filtration profile of the BAM complex using a 16/60 Sephacryl S-300 HR column (GE Healthcare). **B.** SDS-PAGE analysis of peak fractions obtained from gel filtration in panel A. Fractions were pooled and concentrated for crystallization. **C.** SDS-PAGE analysis of pooled fractions from gel filtration after incubation at 4° C for ~10 days. BamB is no longer observed and presumed to be degraded.

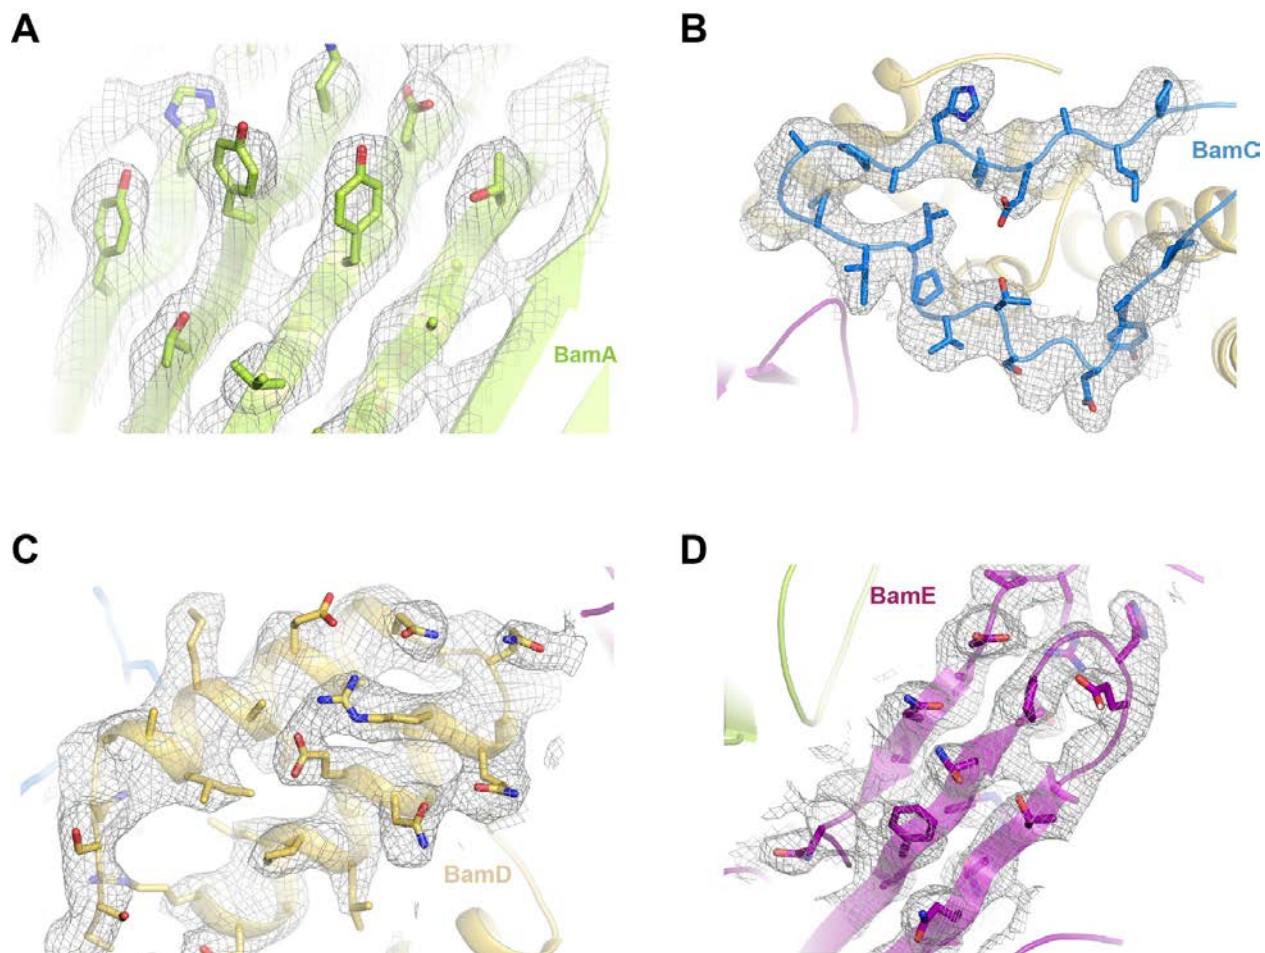

**Figure S2. Representative electron density for each Bam component.** **A.** Density (gray mesh) for BamA (green) along strands  $\beta$ 4- $\beta$ 7 of the  $\beta$ -barrel domain. **B.** Density along residues 49-60 of BamC (blue). **C.** Density along residues 211-244 of BamD (gold). **D.** Density along residues 29-35 and 77-89 of BamE (purple). In all panels, a feature-enhanced map (FEM) is shown at  $1.0 \sigma$ .

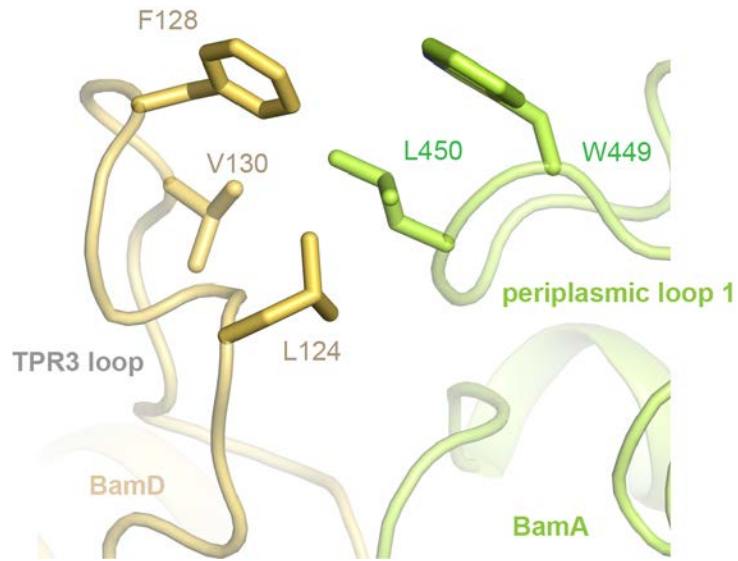

**Figure S3. Interaction of periplasmic loop 1 of BamA with TPR3 loop in BamD.** Zoomed view of the interaction between the TPR3 loop of BamD (gold) with periplasmic loop 1 of BamA (green). This interaction is largely a hydrophobic interaction mediated by L124, F128, and V130 of BamD and W449 and L450 of BamA.

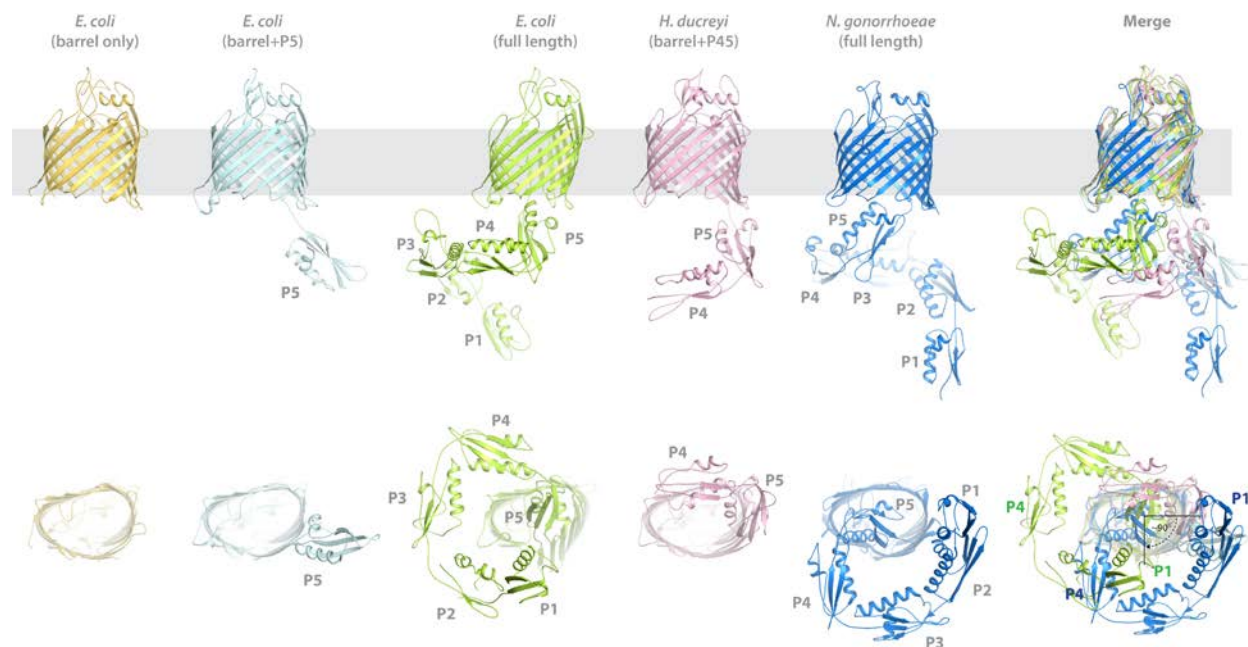

**Figure S4. Comparison of all BamA structures and POTRA domain conformations.** Shown here is a structural comparison of all known BamA structures containing the membrane domain from a membrane view (top row) and view from the periplasm (bottom row). Three structures are from *E. coli* with barrel only (gold, PDB ID 4N75), barrel with POTRA5 only (cyan, PDB ID 4C4V), and full length reported here (green). Two other structures of BamA have been previously reported from *H. ducreyi* containing barrel with POTRA4 and 5 only (pink, PDB ID 4K3C) and a full length structure from *N. gonorrhoeae* (blue, PDB ID 4K3B). Compared to *N. gonorrhoeae*, the POTRA domains of *E. coli* BamA undergo ~90° clockwise twist (bottom of Merge panel).



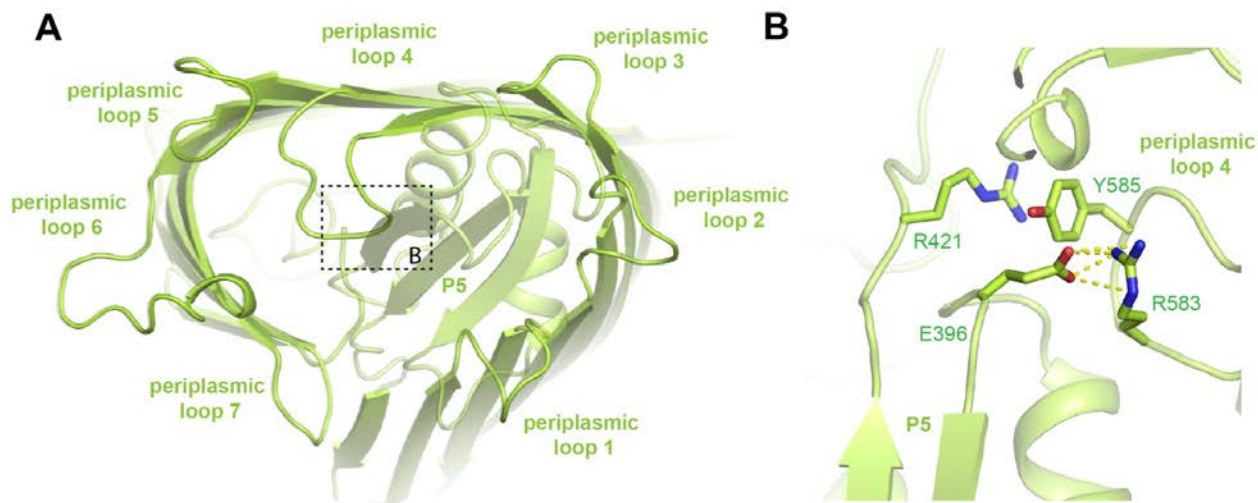

**Figure S5. Periplasmic loops of BamA.** **A.** Seven periplasmic loops shown here are thought to play a role in the function of BamA. They were fully resolved in our crystal structure with many of them making contacts either with POTRA 5 or with other Bam components (Figure S3). **B.** Highlighted here is the interaction of periplasmic loop 4 with POTRA5 where two interactions are key. The first is a salt bridge between residues E396 and R583 and the second pi stacking between R421 and Y585.

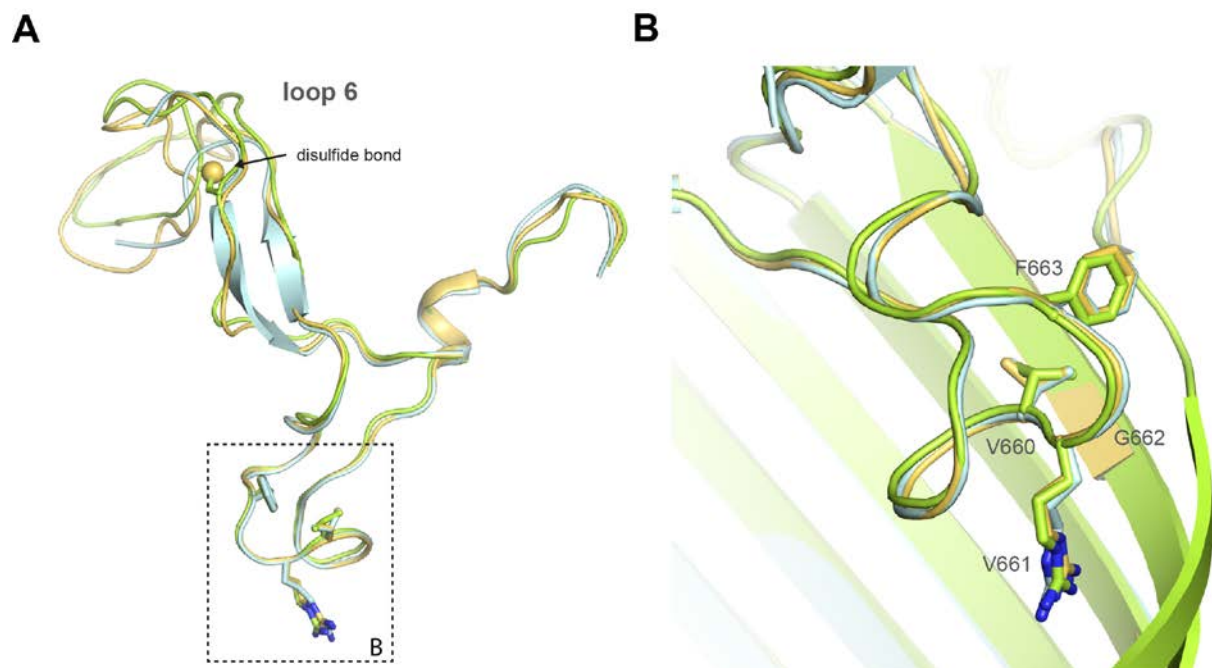

**Figure S6. Conformation of loop 6 and the VRGF motif in BamA.** **A.** Shown here is the entire loop 6 (residues 641-709) from an alignment of our structure (green) with PDB ID 4C4V (cyan) and PDB ID 4N75 (gold). The conformation of the full length of the loop is unchanged with the exception that in our structure, the top of the loop is fully resolved, including the disulfide bond formed between C690/C700 (gold sphere), similar to that which is observed in PDB ID 4N75. **B.** Zoomed view showing that the conserved VRGF motif remains unchanged despite significant conformational changes to the barrel domain upon binding BamCDE.



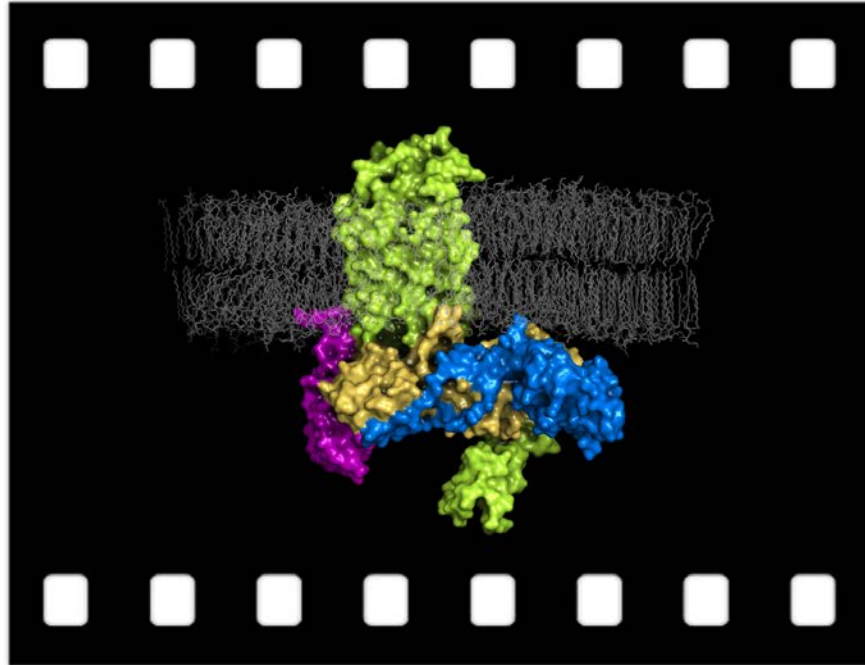

**Movies S1. Overview of the BAM complex structure.** In this study, we report the structure of the fully assembled BAM complex, formed from our crystal structure of BamACDE and the previously reported crystal structure of BamAB. In this movie, we show the overall conformation of the BAM complex and highlight interactions between the Bam components.

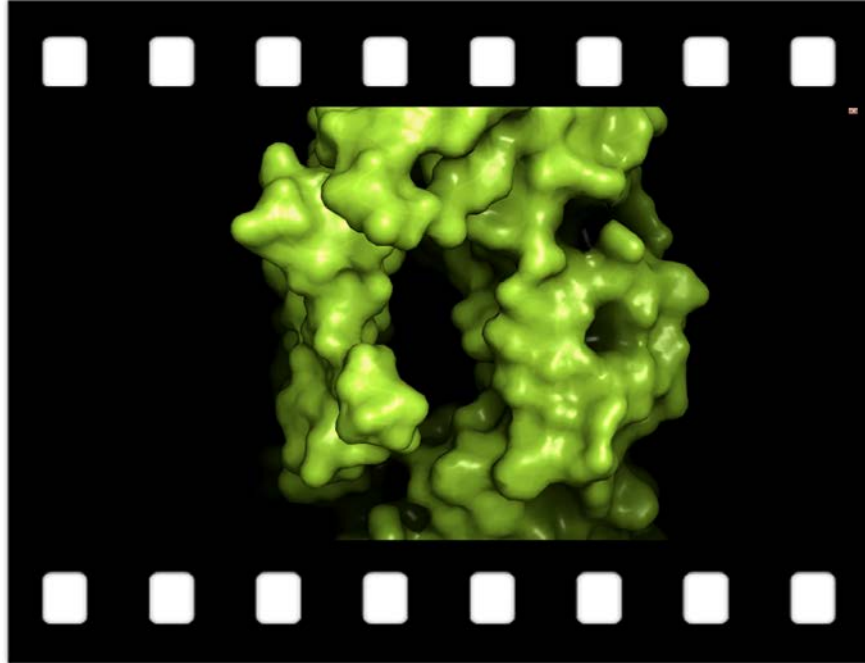

**Movie S2. Morph of the  $\beta$ -barrel domain of BamA.** In our structure of the BamACDE complex, we observe an unprecedented shift of the  $\beta$ -barrel domain of BamA. In this movie, we depict the morph between these observed conformational changes compared to previously reported crystal structures.
